# Supplementary material for: Investigations in the possibility of early detection of colorectal cancer by gas chromatography/triple-quadrupole mass spectrometry
Source: PubMed Central journal article supplement (PMC5370027; doi:10.18632/oncotarget.15081), 2017-02-04
Supplement: oncotarget-08-17115-s001.pdf [file oncotarget-08-17115-s001.pdf]

## Investigations in the possibility of early detection of colorectal cancer by gas chromatography/triple-quadrupole mass spectrometry

### SUPPLEMENTARY FIGURE AND TABLES

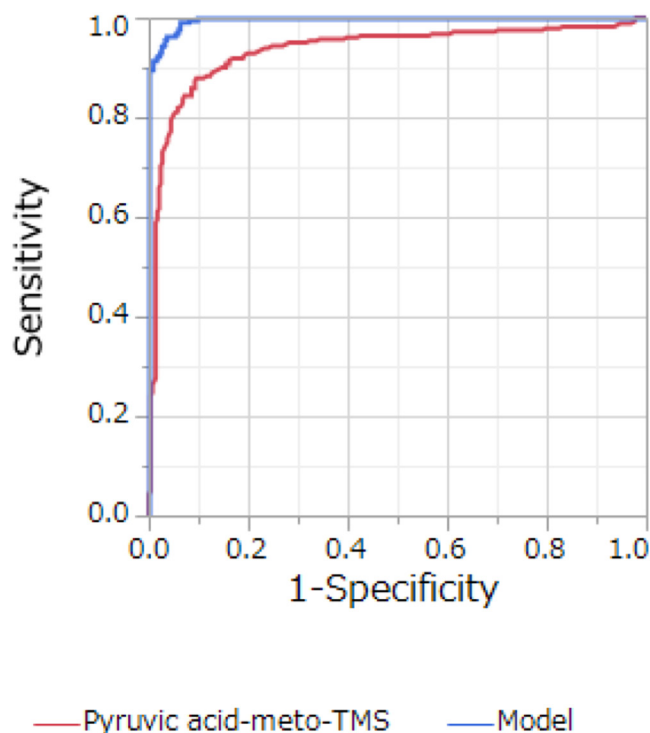

|                       | AUC   | S.E.    | Lower 95%CI | Upper 95%CI | p-value |
|-----------------------|-------|---------|-------------|-------------|---------|
| Pyruvic acid-meto-TMS | 0.936 | 0.0114  | 0.909       | 0.955       | <0.0001 |
| Model                 | 0.996 | 0.00120 | 0.993       | 0.998       |         |

**Supplementary Figure 1: Comparison between pyruvic acid-meto-TMS and the prediction model.** In the ROC curve, the red and blue lines show the results obtained for pyruvic acid-meto-TMS, which was selected via simple linear regression analysis, and the predictive model obtained via multiple logistic regression analysis, respectively. The AUC, S.E., lower 95% confidence interval (CI), upper 95%CI, and p-values for pyruvic acid-meto-TMS and the predictive model are shown in the table below the graph. AUC: area under the curve; S.E.: standard error; CI: confidence interval; TMS: trimethylsilyl group; '-TMS': the number of TMS molecules bound to pyruvic acid via derivatization.

**Supplementary Table 1: Blood biochemistry data for the colorectal cancer patients and healthy volunteers**

|                   | Units | N       | CRC   |       | HV    |       | p-value    |
|-------------------|-------|---------|-------|-------|-------|-------|------------|
|                   |       |         | Mean  | S.D.  | Mean  | S.D.  | CRC vs. HV |
| Total cholesterol | mg/dL | 219/291 | 203.1 | 40.9  | 213.5 | 34.3  | 0.0027     |
| Triglycerides     | mg/dL | 215/291 | 122.4 | 77.9  | 100.3 | 54.4  | 0.0004     |
| HbA1c             | %     | 281/291 | 5.94  | 4.13  | 5.80  | 0.584 | 0.561      |
| Glucose           | mg/dL | 282/291 | 109.2 | 24.2  | 101.9 | 17.7  | <0.0001    |
| Total bilirubin   | mg/dL | 282/291 | 0.699 | 0.262 | 0.938 | 0.325 | <0.0001    |
| AST               | U/L   | 282/291 | 22.6  | 9.52  | 24.1  | 7.56  | 0.0307     |
| ALT               | U/L   | 282/291 | 21.0  | 13.6  | 22.8  | 10.9  | 0.0860     |
| BUN               | mg/dL | 282/291 | 15.3  | 4.50  | 15.5  | 4.34  | 0.638      |
| Cre               | mg/dL | 282/291 | 0.775 | 0.227 | 0.771 | 0.229 | 0.854      |
| CRP               | mg/dL | 276/282 | 0.247 | 0.761 | 0.133 | 0.238 | 0.0184     |
| CEA               | ng/mL | 280/252 | 5.65  | 18.4  | 2.22  | 1.37  | 0.0020     |
| CA19-9            | U/mL  | 280/252 | 16.8  | 20.8  | 13.1  | 10.8  | 0.0084     |

The p-values for total cholesterol, triglycerides, HbA1c, glucose, total bilirubin, AST, ALT, CRP, CEA, and CA19-9 were calculated using Welch's t-test. The number of subjects for which data were obtained varied among the parameters, so the mean and S.D. of the collected data were calculated. The numbers of subjects for whom data were collected are shown. The p-values for BUN and Cre were calculated using the Student's t-test. CRC: colorectal cancer patients; HV: healthy volunteers; HbA1c: hemoglobin A1c; AST: aspartate aminotransferase; ALT: alanine aminotransferase; BUN: blood urea nitrogen; Cre: creatinine; CRP: C-reactive protein; CEA: carcinoembryonic antigen; CA19-9: carbohydrate antigen 19-9; S.D.: standard deviation.

**Supplementary Table 2: Comparison of plasma metabolite levels between the colorectal cancer patients and healthy volunteers**

See Supplementary File 1

Supplementary Table 3: Concentrations of stable isotopes and 2-isopropylmalic acid in the extraction solution

| Compound name                            | Concentration in the extraction solution ( $\mu\text{g/mL}$ ) | Content in 270 $\mu\text{L}$ of the extraction solution ( $\mu\text{g/sample}$ ) |
|------------------------------------------|---------------------------------------------------------------|----------------------------------------------------------------------------------|
| $^{13}\text{C}_3$ -lactic acid           | 74.07                                                         | 20.00                                                                            |
| $^2\text{H}_3$ -2-hydroxybutyric acid    | 1.85                                                          | 0.50                                                                             |
| $^{13}\text{C}_2$ -oxalic acid           | 1.85                                                          | 0.50                                                                             |
| $^2\text{H}_3$ -sacrosine                | 1.85                                                          | 0.50                                                                             |
| $^2\text{H}_8$ -valine                   | 18.52                                                         | 5.00                                                                             |
| $^{13}\text{C}_3$ -dihydroxyacetone      | 1.85                                                          | 0.50                                                                             |
| $^2\text{H}_{10}$ -isoleucine            | 1.85                                                          | 0.50                                                                             |
| $^{13}\text{C}_4$ -fumaric acid          | 1.85                                                          | 0.50                                                                             |
| $^{13}\text{C}_4$ -malic acid            | 1.85                                                          | 0.50                                                                             |
| $^2\text{H}_3$ -aspartic acid            | 1.85                                                          | 0.50                                                                             |
| $^{13}\text{C}_5$ -glutamic acid         | 18.52                                                         | 5.00                                                                             |
| $^{13}\text{C}_6$ -4-hydroxybenzoic acid | 1.85                                                          | 0.50                                                                             |
| $^2\text{H}_3$ -lauric acid              | 18.52                                                         | 5.00                                                                             |
| $^{13}\text{C}_5$ -ribose                | 1.85                                                          | 0.50                                                                             |
| $^{13}\text{C}_2$ -taurine               | 74.07                                                         | 20.00                                                                            |
| $^2\text{H}_4$ -citric acid              | 18.52                                                         | 5.00                                                                             |
| $^2\text{H}_7$ -ornithine                | 1.85                                                          | 0.50                                                                             |
| $^{13}\text{C}_6$ -tyrosine              | 1.85                                                          | 0.50                                                                             |
| $^{13}\text{C}_6$ -dopa                  | 1.85                                                          | 0.50                                                                             |
| $^2\text{H}_6$ -kynurenine               | 18.52                                                         | 5.00                                                                             |
| $^2\text{H}_8$ -cystamine                | 18.52                                                         | 5.00                                                                             |
| $^{13}\text{C}_{11}$ -tryptophan         | 1.85                                                          | 0.50                                                                             |
| 2-isopropylmalic acid                    | 18.52                                                         | 5.00                                                                             |

The concentrations of the stable isotopes and 2-isopropylmalic acid dissolved in the extraction solution and their concentrations in 270  $\mu\text{L}$  of the extraction solution (1 sample) are shown.

**Supplementary Table 4: MRM parameters for the detected metabolites**

See Supplementary File 2
